# Supplementary material for: Methanolysis of Poly(lactic Acid) Using Catalyst Mixtures and the Kinetics of Methyl Lactate Production
Source: MDPI journal article supplement (doi:10.3390/polym14091763), 2022-04-26
Supplement: s1 [file s1]

# **Supplementary Material for**

## **Methanolysis of Poly(lactic acid) Using Catalyst Mixtures and the Kinetics of Methyl Lactate Production**

**Fabio M. Lamberti<sup>1</sup>, Luis A. Román-Ramírez<sup>3</sup>, Andrew P. Dove<sup>2</sup>, Joseph Wood<sup>1\*</sup>**

<sup>1</sup> School of Chemical Engineering, University of Birmingham, Edgbaston, Birmingham B15 2TT, United Kingdom

<sup>2</sup> School of Chemistry, University of Birmingham, Edgbaston, Birmingham B15 2TT, United Kingdom

<sup>3</sup> London South Bank University, 103 Borough Road, London, SE1 0AA, United Kingdom

\* Correspondence: J.Wood@bham.ac.uk

## Contents

|                          |   |
|--------------------------|---|
| 1 Stirring speed .....   | 3 |
| 2 Rate coefficients..... | 3 |

## 1 Stirring speed

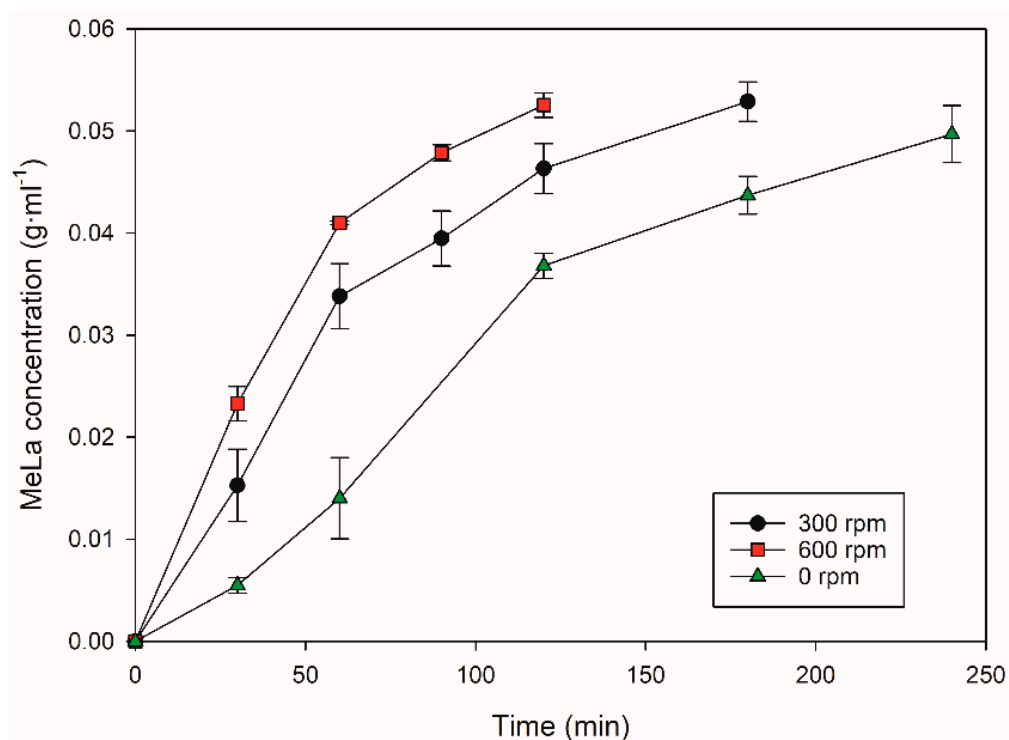

**Figure S1.** Methanolysis of 2 g of PLA at 130°C, 9 eq of MeOH and 2 mol% Zn(OAc)<sub>2</sub>. Effect of Stirring speed on the MeLa concentration (g·mL<sup>-1</sup>) vs. Time (min).

## 2 Rate coefficients

**Table S1.** Rate coefficients for each experiment, catalysed by Zn(OAc)<sub>2</sub>.

| Temperature (°C) | $k_1$ (min <sup>-1</sup> ) | $k_2$ (min <sup>-1</sup> ) | $k_{-2}$ (min <sup>-1</sup> ) |
|------------------|----------------------------|----------------------------|-------------------------------|
| 130              | 0.0897                     | 0.0914                     | 0.0134                        |
| 130              | 0.0843                     | 0.0676                     | 0.0118                        |
| 120              | 0.0633                     | 0.0537                     | 0.0157                        |
| 120              | 0.0667                     | 0.0649                     | 0.0104                        |
| 110              | 0.0506                     | 0.0519                     | 0.0060                        |
| 110              | 0.0496                     | 0.0427                     | 0.0054                        |
| 100              | 0.0370                     | 0.0366                     | 0.0042                        |
| 100              | 0.0458                     | 0.0318                     | 0.0050                        |
| 90               | 0.0381                     | 0.0425                     | 0.0107                        |
| 90               | 0.0388                     | 0.0411                     | 0.0090                        |
